# Supplementary material
Source: PubMed Central journal article supplement (PMC7356672)
Supplement: NIHMS1590792-supplement-Supplemental_tables.pdf [file NIHMS1590792-supplement-Supplemental_tables.pdf]

Supplemental Table 1: SAHA dose response for prevention of 231-BR brain metastatic colonization<sup>A</sup>.

| Experiment | Dose (mg/kg)     | N | Micrometastases:  |               |                 | Large Metastases <sup>B</sup> : |              |        |
|------------|------------------|---|-------------------|---------------|-----------------|---------------------------------|--------------|--------|
|            |                  |   | Mean <sup>C</sup> | 95% CI        | P <sup>D</sup>  | Mean                            | 95% CI       | P      |
| 1          | 0                | 5 | 205               | 165 to 246    |                 | 6.78                            | 5.42 to 8.14 |        |
|            | 100              | 3 | 140               | 114 to 167    | 0.015           | 2.87                            | 1.11 to 4.63 | 0.003  |
|            | 150 <sup>E</sup> | 6 | 152               | 115 to 189    | 0.081           | 3.52                            | 2.27 to 4.76 | 0.003  |
| 2          | 0                | 5 | 72.5              | 51.8 to 93.2  |                 | 3.26                            | 2.68 to 3.84 |        |
|            | 100              | 9 | 78.3              | 48.4 to 108.3 | NS <sup>F</sup> | 2.28                            | 1.26 to 3.29 | NS     |
|            | 150              | 9 | 66.6              | 51.2 to 82.1  | NS              | 1.47                            | 1.03 to 1.90 | 0.0003 |

<sup>A</sup>231-BR cells (500,000 in Experiment 1; 100,000 in Experiment 2) were injected into the left cardiac ventricle of Balb/c nude mice. SAHA was administered once daily by ip injection starting 3 days post-injection.

<sup>B</sup>Size of metastases determined by a 16 mm<sup>2</sup> ocular grid. Large metastases greater than 300 microns on the longest axis.  
per section.

<sup>C</sup>Mean number of metastases per section counted in 10 step sections from one hemisphere of the brain.

<sup>D</sup>A two-factor factorial ANOVA was used to determine significance. All p-values are two-tailed and adjusted for multiple comparisons using Dunnett's method.

<sup>E</sup>In Experiment 1, this group of mice received 200 mg/kg starting 3 days post injection but due to toxicity, the dose was reduced to 150 mg/kg on day 8 post-injection.

<sup>F</sup> Not significant.

Supplemental Table 2 – Top genes downregulated in tumor cells from brain metastasis in vorinostat treated mice compared to tumor cells from brain metastasis in vehicle treated mice listed in order of false discovery rate.

| Fold difference | Symbol   | GeneName                                                                                                         |
|-----------------|----------|------------------------------------------------------------------------------------------------------------------|
| 29.33           | HES1     | hairy and enhancer of split 1, (Drosophila)                                                                      |
| 9.77            | ZNF202   | zinc finger protein 202                                                                                          |
| 8.02            | MEPCE    | methylphosphate capping enzyme                                                                                   |
| 16.02           | ID3      | inhibitor of DNA binding 3, dominant negative helix-loop-helix protein                                           |
| 5.82            | HES1     | hairy and enhancer of split 1, (Drosophila)                                                                      |
| 18.74           | SUV420H1 | suppressor of variegation 4-20 homolog 1 (Drosophila)                                                            |
| 4.92            | GMEB2    | glucocorticoid modulatory element binding protein 2                                                              |
| 11.95           | KLF2     | Kruppel-like factor 2 (lung)                                                                                     |
| 4.95            | CTCF     | CCCTC-binding factor (zinc finger protein)                                                                       |
| 7.83            | ZNF24    | zinc finger protein 24                                                                                           |
| 4.34            | MXD4     | MAX dimerization protein 4                                                                                       |
| 8.05            | FRMD4A   | FERM domain containing 4A                                                                                        |
| 4.75            | SEMA4C   | sema domain, immunoglobulin domain (Ig), transmembrane domain (TM) and short cytoplasmic domain, (semaphorin) 4C |
| 4.89            | TNFSF4   | tumor necrosis factor (ligand) superfamily, member 4                                                             |
| 4.88            | PON2     | paraoxonase 2                                                                                                    |
| 4.51            | CPT1B    | carnitine palmitoyltransferase 1B (muscle)                                                                       |
| 5.47            | ZBTB38   | zinc finger and BTB domain containing 38                                                                         |
| 4.04            | HEATR6   | HEAT repeat containing 6                                                                                         |
| 4.60            | SCYL3    | SCY1-like 3 (S. cerevisiae)                                                                                      |
| 3.24            | TMED1    | transmembrane emp24 protein transport domain containing 1                                                        |
| 3.25            | PAN2     | PAN2 polyA specific ribonuclease subunit homolog (S. cerevisiae)                                                 |
| 3.07            | ZBTB40   | zinc finger and BTB domain containing 40                                                                         |
| 3.84            | GOSR1    | golgi SNAP receptor complex member 1                                                                             |
| 5.61            | PHF17    | PHD finger protein 17                                                                                            |
| 4.93            | ZNF274   | zinc finger protein 274                                                                                          |
| 5.68            | ZNF24    | zinc finger protein 24                                                                                           |
| 6.61            | SCYL3    | SCY1-like 3 (S. cerevisiae)                                                                                      |
| 5.02            | ZNF193   | zinc finger protein 193                                                                                          |
| 3.60            | EIF5     | eukaryotic translation initiation factor 5                                                                       |
| 4.15            | RBM22    | RNA binding motif protein 22                                                                                     |
| 3.52            | HEATR6   | HEAT repeat containing 6                                                                                         |
| 3.86            | CYTH2    | cytohesin 2                                                                                                      |
| 4.21            | SOX9     | SRY (sex determining region Y)-box 9                                                                             |

|      |           |                                                                |
|------|-----------|----------------------------------------------------------------|
| 5.51 | PARVA     | parvin, alpha                                                  |
| 3.17 | TRIM68    | tripartite motif-containing 68                                 |
| 6.19 | DDX17     | DEAD (Asp-Glu-Ala-Asp) box polypeptide 17                      |
| 3.78 | HMG2L1    | high-mobility group protein 2-like 1                           |
| 3.28 | CALML4    | calmodulin-like 4                                              |
| 2.62 | CUL7      | cullin 7                                                       |
| 3.01 | WDR6      | WD repeat domain 6                                             |
| 3.80 | LOC791120 | hypothetical LOC791120                                         |
| 2.66 | PATZ1     | POZ (BTB) and AT hook containing zinc finger 1                 |
| 3.51 | RAD52     | RAD52 homolog (S. cerevisiae)                                  |
| 3.77 | PPP1R10   | protein phosphatase 1, regulatory (inhibitor) subunit 10       |
| 2.84 | RBM4B     | RNA binding motif protein 4B                                   |
| 4.57 | PHF15     | PHD finger protein 15                                          |
| 3.37 | WIPF2     | WAS/WASL interacting protein family, member 2                  |
| 2.59 | TRIM27    | tripartite motif-containing 27                                 |
| 3.78 | DLG5      | discs, large homolog 5 (Drosophila)                            |
| 6.62 | DUSP4     | dual specificity phosphatase 4                                 |
| 4.16 | PCBP2     | poly(rC) binding protein 2                                     |
| 3.92 | SF1       | splicing factor 1                                              |
| 4.15 | ERMAP     | erythroblast membrane-associated protein (Scianna blood group) |
| 4.48 | FCGBP     | Fc fragment of IgG binding protein                             |
| 2.98 | PRDX2     | peroxiredoxin 2                                                |
| 4.78 | INTS6     | integrator complex subunit 6                                   |
| 4.16 | ZFP64     | zinc finger protein 64 homolog (mouse)                         |
| 8.44 | PRDM10    | PR domain containing 10                                        |
| 2.90 | RHOBTB2   | Rho-related BTB domain containing 2                            |
| 2.92 | RBM5      | RNA binding motif protein 5                                    |
| 3.54 | JRK       | jerky homolog (mouse)                                          |
| 2.54 | CTGLF1    | centaurin, gamma-like family, member 1                         |
| 2.98 | GMEB2     | glucocorticoid modulatory element binding protein 2            |

---

Supplemental Table 3 – Top genes upregulated in tumor cells from brain metastasis in vorinostat treated mice compared to tumor cells from brain metastasis in vehicle treated mice listed in order of false discovery rate.

| Fold difference | Symbol   | GeneName                                                                     |
|-----------------|----------|------------------------------------------------------------------------------|
| 8.81            | AVPI1    | arginine vasopressin-induced 1                                               |
| 14.90           | STC1     | stanniocalcin 1                                                              |
| 12.80           | NRG1     | neuregulin 1                                                                 |
| 3.72            | MAP3K9   | mitogen-activated protein kinase kinase kinase 9                             |
| 14.49           | TUFT1    | tuftelin 1                                                                   |
| 78.80           | HBE1     | hemoglobin, epsilon 1                                                        |
| 11.86           | ST3GAL5  | ST3 beta-galactoside alpha-2,3-sialyltransferase 5                           |
| 5.85            | CXCR4    | chemokine (C-X-C motif) receptor 4                                           |
| 4.05            | CLP1     | CLP1, cleavage and polyadenylation factor I subunit, homolog (S. cerevisiae) |
| 4.00            | GATA2    | GATA binding protein 2                                                       |
| 3.15            | SNRPA1   | small nuclear ribonucleoprotein polypeptide A'                               |
| 18.86           | HBA1     | hemoglobin, alpha 1                                                          |
| 4.94            | PECI     | peroxisomal D3,D2-enoyl-CoA isomerase                                        |
| 4.54            | EFNA1    | ephrin-A1                                                                    |
| 4.00            | TBPL1    | TBP-like 1                                                                   |
| 13.35           | PTCH1    | patched homolog 1 (Drosophila)                                               |
| 6.32            | GPRC5A   | G protein-coupled receptor, family C, group 5, member A                      |
| 4.12            | DAD1     | defender against cell death 1                                                |
| 4.87            | MID1     | midline 1 (Opitz/BBB syndrome)                                               |
| 5.99            | KIAA1609 | KIAA1609                                                                     |
| 4.69            | PRPS1    | phosphoribosyl pyrophosphate synthetase 1                                    |
| 3.24            | GLRX     | glutaredoxin (thioltransferase)                                              |
| 3.36            | BZW2     | basic leucine zipper and W2 domains 2                                        |
| 3.66            | RNF24    | ring finger protein 24                                                       |
| 4.67            | CHST7    | carbohydrate (N-acetylglucosamine 6-O) sulfotransferase 7                    |
| 5.69            | SPATA2L  | spermatogenesis associated 2-like                                            |
| 2.72            | CSRP2    | cysteine and glycine-rich protein 2                                          |
| 3.04            | COPS2    | COP9 constitutive photomorphogenic homolog subunit 2 (Arabidopsis)           |
| 4.68            | ZSCAN16  | zinc finger and SCAN domain containing 16                                    |
| 3.31            | JARID2   | jumonji, AT rich interactive domain 2                                        |
| 2.95            | GPN3     | GPN-loop GTPase 3                                                            |
| 2.89            | ARID3B   | AT rich interactive domain 3B (BRIGHT-like)                                  |
| 2.54            | NUDT21   | nudix (nucleoside diphosphate linked moiety X)-type motif 21                 |
| 4.69            | TTR      | transthyretin                                                                |

|      |          |                                                                                                |
|------|----------|------------------------------------------------------------------------------------------------|
| 2.44 | LIMS1    | LIM and senescent cell antigen-like domains 1                                                  |
| 2.76 | DUSP14   | dual specificity phosphatase 14                                                                |
| 4.09 | KIAA1609 | KIAA1609                                                                                       |
| 3.15 | PVT1     | Pvt1 oncogene homolog (mouse)                                                                  |
| 3.77 | LIMA1    | LIM domain and actin binding 1                                                                 |
| 4.67 | SKP1     | S-phase kinase-associated protein 1                                                            |
| 2.70 | BRP44    | brain protein 44                                                                               |
| 3.23 | ATG4A    | ATG4 autophagy related 4 homolog A ( <i>S. cerevisiae</i> )                                    |
| 2.86 | EHD1     | EH-domain containing 1                                                                         |
| 3.46 | LMCD1    | LIM and cysteine-rich domains 1                                                                |
| 4.73 | SEC31A   | SEC31 homolog A ( <i>S. cerevisiae</i> )                                                       |
| 3.74 | FAM129A  | family with sequence similarity 129, member A                                                  |
| 3.07 | CYCS     | cytochrome c, somatic                                                                          |
| 2.58 | TJP1     | tight junction protein 1 (zona occludens 1)                                                    |
| 3.32 | ADA      | adenosine deaminase                                                                            |
| 4.80 | DAAM1    | dishevelled associated activator of morphogenesis 1                                            |
| 3.27 | ELOVL5   | ELOVL family member 5, elongation of long chain fatty acids (FEN1/Elo2, SUR4/Elo3-like, yeast) |
| 2.73 | SPCS1    | signal peptidase complex subunit 1 homolog ( <i>S. cerevisiae</i> )                            |
| 3.37 | MEGF9    | multiple EGF-like-domains 9                                                                    |

---
