# Supplementary material
Source: PubMed Central journal article supplement (PMC7356672)

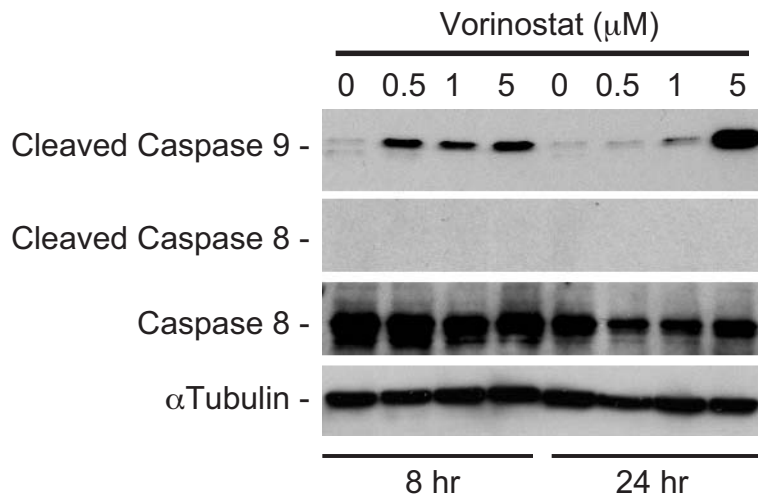

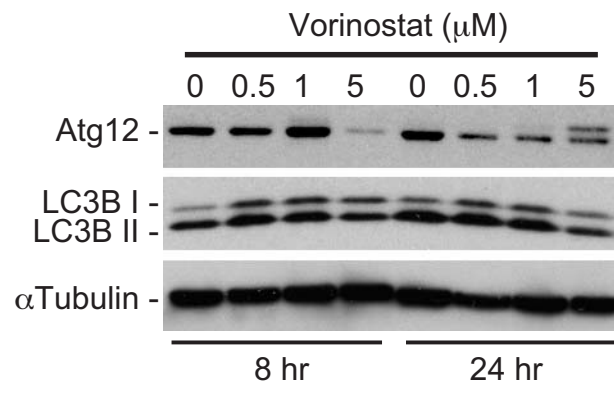

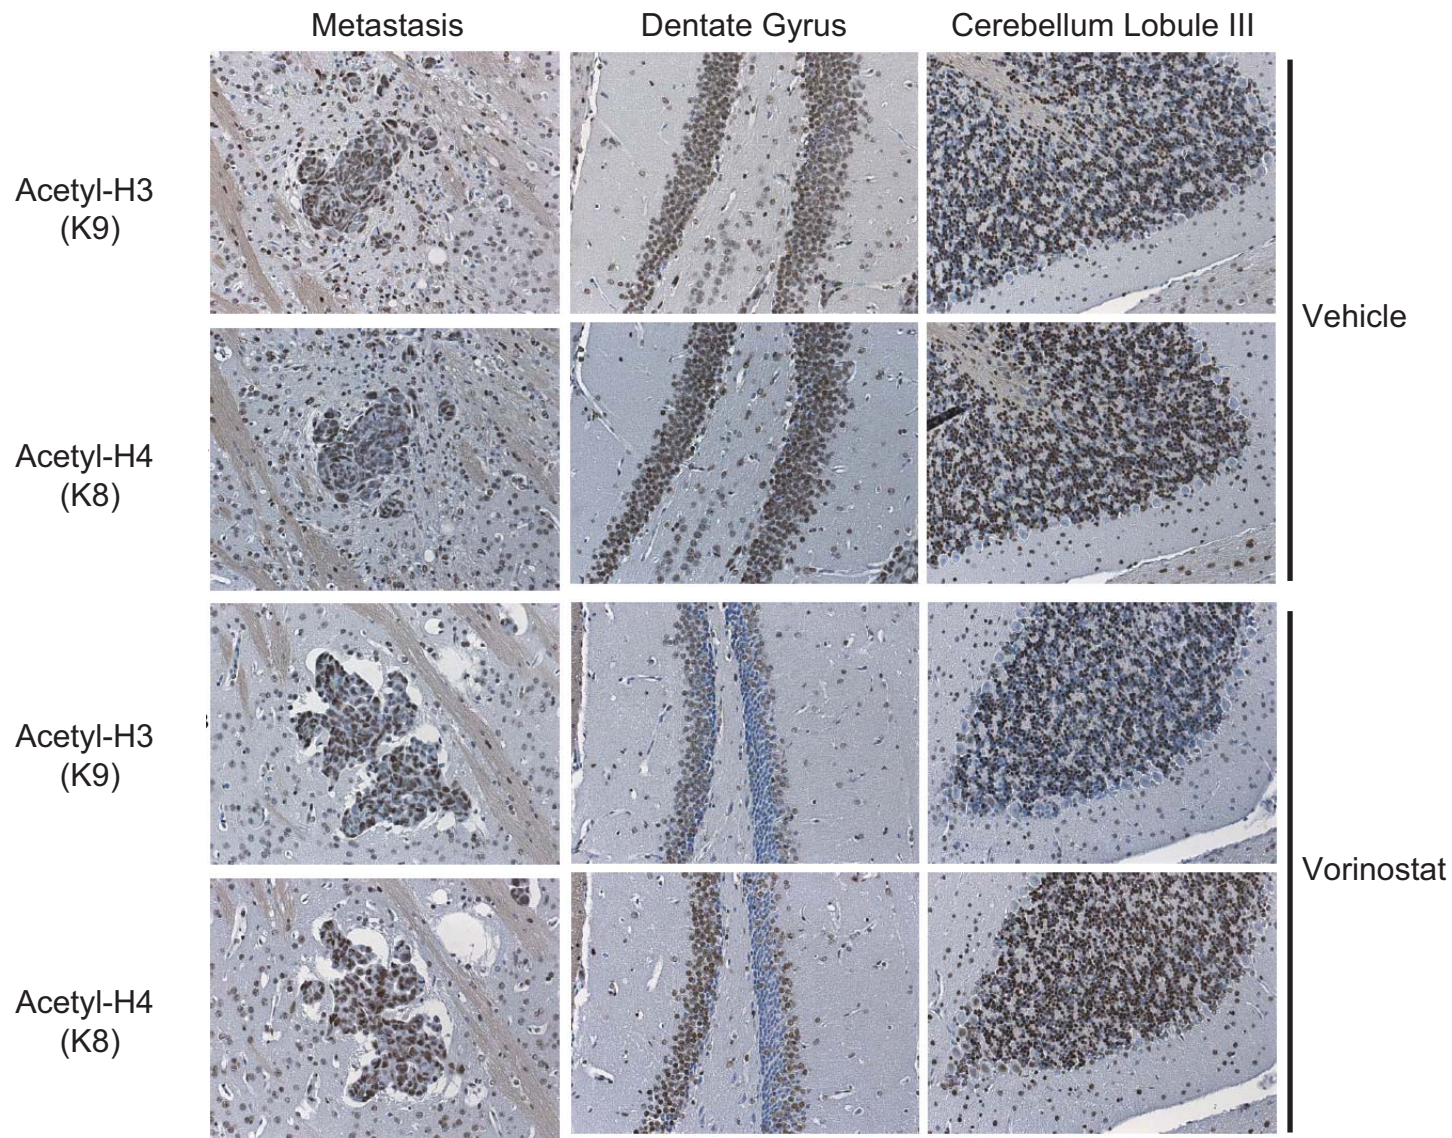

Supplement: NIHMS1590792-supplement-Supplemental_figures.pdf [file NIHMS1590792-supplement-Supplemental_figures.pdf]
